# Supplementary material
Source: HighWire-hosted journal article supplement (http://cmajopen.ca/highwire/filestream/81114/field_highwire_adjunct_files/0/2018-0072-1-at.pdf)
Supplement: 2018-0072-1-at.pdf [file 2018-0072-1-at.pdf]

**Appendix 1:** Comparisons of data elements in the CIHI vs. STS risk prediction models for 30-day in-hospital mortality after isolated CABG, isolated AVR and combined CABG + AVR

|                                             | Isolated CABG |      | Isolated AVR |      | CABG+AVR |      |
|---------------------------------------------|---------------|------|--------------|------|----------|------|
|                                             | STS           | CIHI | STS          | CIHI | STS      | CIHI |
| <i>Patient demographics</i>                 |               |      |              |      |          |      |
| Age                                         | +             | +    | +            | +    | +        | +    |
| Gender                                      | +             | +    | +            | +    | +        | +    |
| <i>Medical history</i>                      |               |      |              |      |          |      |
| Previous acute myocardial infarction        |               |      |              |      |          |      |
| <1 day before procedure                     | +             |      |              |      | +        |      |
| 1-21 days before procedure                  | +             |      |              |      | +        |      |
| >21 days before procedure                   | +             |      |              |      | +        |      |
| <365 days before procedure                  |               | +    |              |      |          | +    |
| Any previous cardiac operations             |               |      |              |      |          |      |
| Previous cardiac operations within 365 days |               | +    |              | +    |          | +    |
| Number of previous cardiac operations       |               |      |              |      |          |      |
|                                             | +             |      |              |      |          |      |
| Previous cerebrovascular accident           |               |      |              |      |          |      |
|                                             | +             |      | +            |      | +        |      |
| <i>Cardiac and vascular morbidities</i>     |               |      |              |      |          |      |
| Acute coronary syndrome                     |               |      |              |      |          |      |
|                                             | +             | +    |              |      |          | +    |
| Ejection fraction                           |               |      |              |      |          |      |
|                                             | +             |      | +            |      | +        |      |
| Functional status (NYHA class)              |               |      |              |      |          |      |
|                                             | +             |      | +            |      | +        |      |
| Left main disease                           |               |      |              |      |          |      |
|                                             | +             |      | +            |      | +        |      |
| Number of disease coronary branches         |               |      |              |      |          |      |
|                                             | +             |      | +            |      | +        |      |
| Aortic valve stenosis                       |               |      |              |      |          |      |
|                                             |               |      | +            |      |          |      |
| Cardiac dysrhythmias                        |               |      |              |      |          |      |
|                                             |               | +    |              | +    |          | +    |
| Atrial fibrillation                         | +             |      | +            |      | +        |      |
| Cerebrovascular disease                     |               |      |              |      |          |      |
|                                             | +             |      | +            | +    | +        |      |

Appendix to Manlhiot C, Rao V, Rubin B, et al Comparison of cardiac surgery mortality reports using administrative and clinical data sources: a prospective cohort study. *CMAJ Open* 2018.

DOI:10.9778/cmajo.20180072. Copyright © 2018 Joule Inc. or its licensors

|                                                       |                      |             |                     |             |                   |             |
|-------------------------------------------------------|----------------------|-------------|---------------------|-------------|-------------------|-------------|
| Peripheral vascular disease                           | +                    | +           |                     |             |                   |             |
| Endocarditis                                          |                      |             | +                   | +           |                   |             |
| Hypertension                                          |                      |             | +                   |             |                   |             |
| <i>Non-cardiac comorbidities</i>                      |                      |             |                     |             |                   |             |
| Body surface area                                     | +                    |             | +                   |             | +                 |             |
|                                                       | <b>Isolated CABG</b> |             | <b>Isolated AVR</b> |             | <b>CABG + AVR</b> |             |
|                                                       | <b>STS</b>           | <b>CIHI</b> | <b>STS</b>          | <b>CIHI</b> | <b>STS</b>        | <b>CIHI</b> |
| Acute renal failure                                   | +                    | +           | +                   | +           | +                 | +           |
| Charlson index                                        |                      |             |                     |             |                   |             |
| Congestive heart failure                              | +                    | +           | +                   | +           | +                 | +           |
| Dementia                                              |                      | +           |                     | +           |                   | +           |
| Chronic pulmonary disease                             | +                    | +           | +                   | +           | +                 | +           |
| Rheumatologic disease                                 |                      | +           |                     | +           |                   | +           |
| Mild liver disease                                    |                      | +           |                     | +           |                   | +           |
| Moderate or severe liver disease                      |                      | +           |                     | +           |                   | +           |
| Diabetes with organ failure                           | +                    | +           | +                   | +           | +                 | +           |
| Hemiplegia or paraplegia                              |                      | +           |                     | +           |                   | +           |
| Renal disease                                         | +                    | +           | +                   | +           | +                 | +           |
| HIV infection                                         |                      | +           |                     | +           |                   | +           |
| Primary cancer                                        |                      | +           |                     | +           |                   | +           |
| Metastatic cancer                                     |                      | +           |                     | +           |                   | +           |
| <i>Procedure</i>                                      |                      |             |                     |             |                   |             |
| Elective vs. urgent/emergent admission                | +                    | +           | +                   | +           | +                 | +           |
| Salvage procedure (resuscitation/circulatory support) | +                    |             | +                   |             | +                 |             |
| Cardiogenic shock                                     | +                    | +           | +                   | +           | +                 | +           |
| Intra-aortic balloon pump/inotropic support           | +                    |             | +                   |             | +                 |             |
| Multiple cardiac interventions in same episode        | +                    | +           |                     |             | +                 | +           |

Appendix to Manlhiot C, Rao V, Rubin B, et al Comparison of cardiac surgery mortality reports using administrative and clinical data sources: a prospective cohort study. *CMAJ Open* 2018.

DOI:10.9778/cmajo.20180072. Copyright © 2018 Joule Inc. or its licensors
